# Supplementary material
Source: bioRxiv or medRxiv preprint supplement (https://www.biorxiv.org/highwire/filestream/102747/field_highwire_adjunct_files/0/337196-1.pdf)
Supplement: Supplementary file [file 337196-1.pdf]

Tissue-specific Gene Expression Prediction Associates  
Vitiligo with SUOX through an Active Enhancer  
(Supplementary)

Zhihua Qi<sup>1,2</sup>, Shiqi Xie<sup>3</sup>, Rui Chen<sup>4</sup>, Haji A. Aisa<sup>5</sup>, Gary C. Hon<sup>3</sup>,  
and Yongtao Guan<sup>1,2,4,6</sup>

24 May 2018

- 1 USDA/ARS Children's Nutrition Research Center
- 2 Department of Pediatrics, Baylor College of Medicine
- 3 Cecil H. and Ida Green Center for Reproductive Biology Sciences, Department of Obstetrics and Gynecology, University of Texas Southwestern Medical Center, Dallas, TX 75390, USA
- 4 Department of Molecular and Human Genetics, Baylor College of Medicine
- 5 Key Laboratory of Chemistry of Plant Resources in Arid Regions, Xinjiang Technical Institute of Physics and Chemistry, CAS
- 6 Current Address: Center for Statistical Genetics and Genomics, Department of Biostatistics and Bioinformatics, Duke University

# 1 Supplementary Figures

**A**

| Tissue type | Blood    | Nerve    | Muscle   | Lung     | Skin     |
|-------------|----------|----------|----------|----------|----------|
| Sample size | 338      | 256      | 256      | 278      | 302      |
| Germ layer  | Mesoderm | Ectoderm | Mesoderm | Entoderm | Ectoderm |

**B**

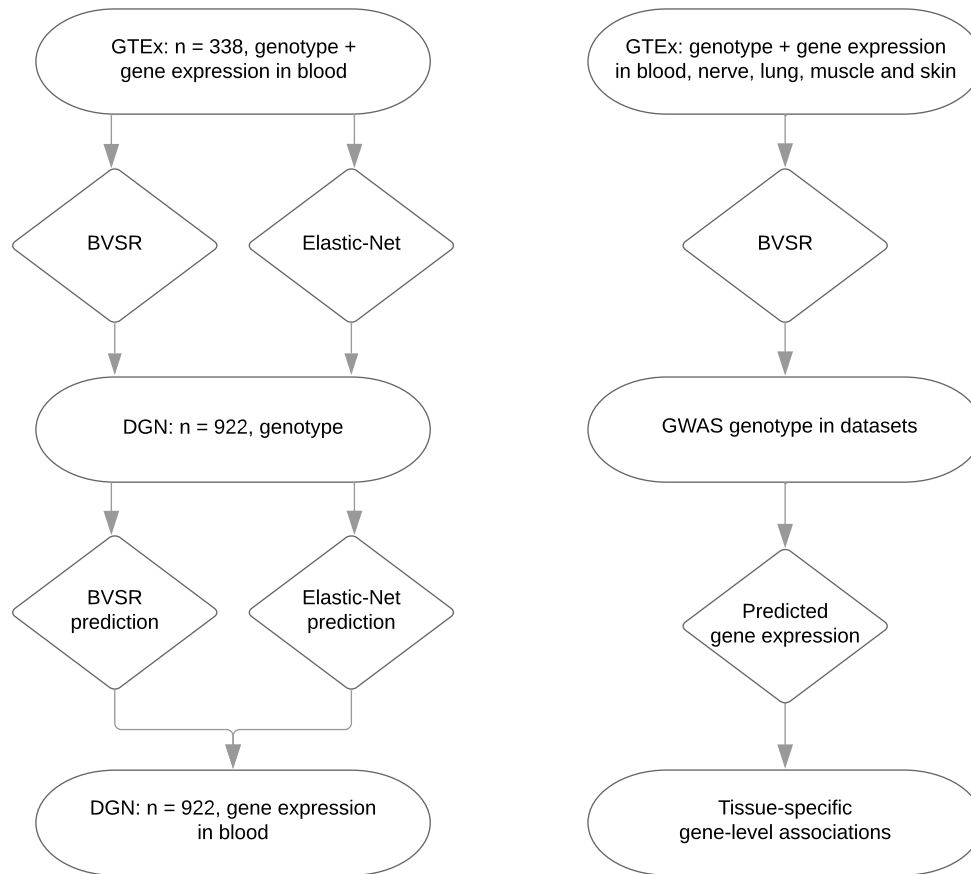

Figure S1: **Study design.** Left workflow compares performance in gene expression prediction between BVSr and Elastic-Net. Right workflow illustrates tissue-specific gene expression prediction and gene-level association.

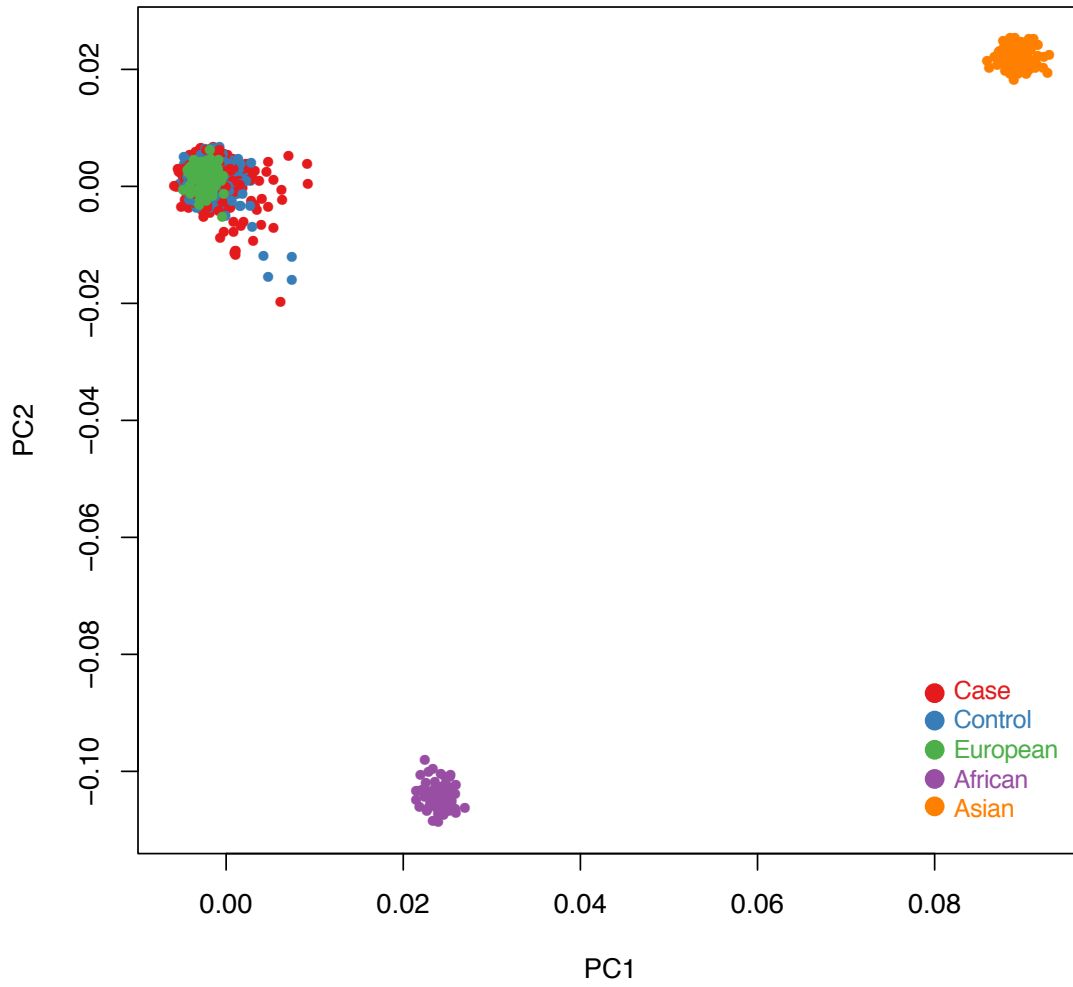

Figure S2: **Principal components plot of study samples.** Plot shows study subjects are clustered with HapMap3 samples of European decents.

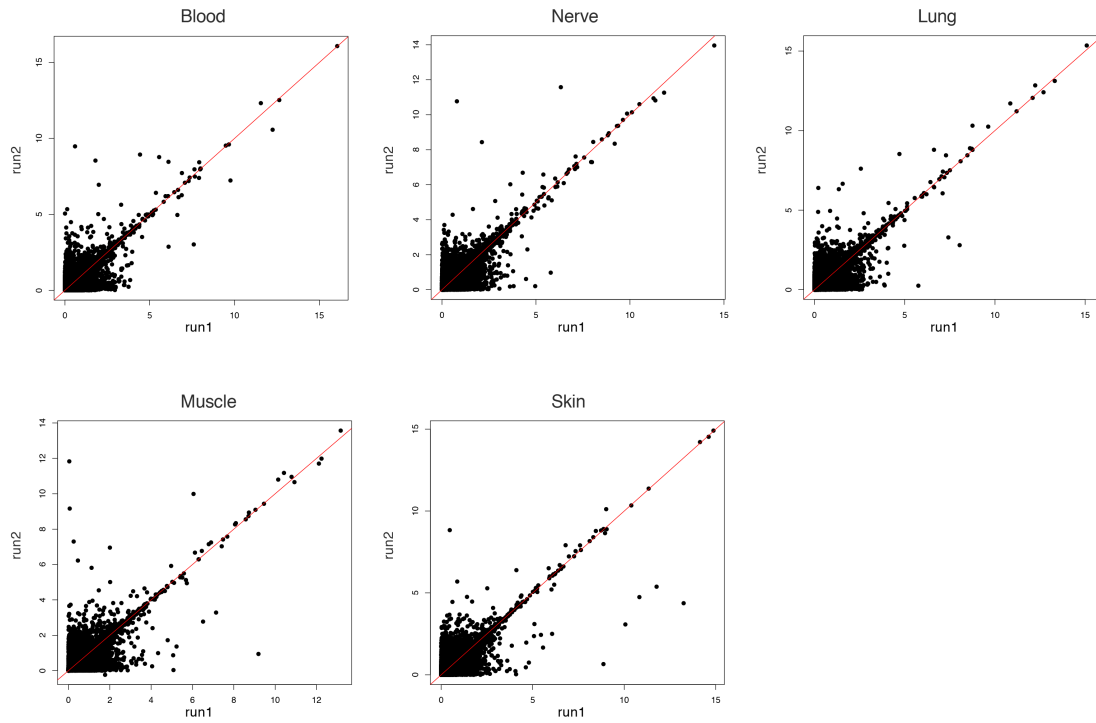

**Figure S3: Comparison between two independent gene-expression prediction.** For each gene in each tissue, we fit the BVSR model twice and obtain two predicted gene expressions, each of which produced a p-value in association with vitiligo status. We plot two sets  $-\log_{10}(\text{p-values})$  against each other separately for each tissue.

## 2 Supplementary Table

Table S1: **Vitiligo significant hits in the MHC region.** P: p-values; Q: adjusted p-values using BHY procedure; OR: odds ratio. Position is the starting location of a gene and coordinates are from HG19. Significant test statistics ( $Q < 0.05$ ) are marked bold. Only genes significant in more than one tissues are shown. Known GWAS hits are marked by †. Pseudogenes are marked by ‡.

| Gene               | Chr | Position | Statistics | Blood          | Nerve          | Lung           | Muscle         | Skin           |
|--------------------|-----|----------|------------|----------------|----------------|----------------|----------------|----------------|
| RPS17P1†           | 6   | 29457048 | P          | N/A            | 0.62           | 1.1e-02        | <b>8.5e-08</b> | <b>3.9e-08</b> |
|                    |     |          | Q          | N/A            | 1              | 1              | <b>1.3e-03</b> | <b>6.7e-04</b> |
|                    |     |          | OR         | N/A            | 0.98           | 1.09           | <b>1.22</b>    | <b>0.80</b>    |
| GABBR1             | 6   | 29523406 | P          | 0.48           | <b>2.7e-11</b> | 4.3e-04        | 2.2e-05        | <b>3.2e-06</b> |
|                    |     |          | Q          | 1              | <b>1.2e-06</b> | 1              | 0.16           | <b>2.6e-02</b> |
|                    |     |          | OR         | 1.02           | <b>1.28</b>    | 0.87           | 1.17           | <b>1.18</b>    |
| MOG                | 6   | 29624758 | P          | <b>2.1e-07</b> | 4.0e-04        | 0.27           | <b>3.2e-11</b> | 1.6e-02        |
|                    |     |          | Q          | <b>3.0e-03</b> | 1              | 1              | <b>1.4e-06</b> | 1              |
|                    |     |          | OR         | <b>0.81</b>    | 1.14           | 1.04           | <b>1.29</b>    | 0.91           |
| ZFP57              | 6   | 29640169 | P          | <b>4.0e-08</b> | <b>4.9e-06</b> | <b>4.5e-08</b> | 2.6e-05        | 7.34e-06       |
|                    |     |          | Q          | <b>7.3e-04</b> | <b>3.6e-02</b> | <b>7.8e-04</b> | 0.17           | 5.1e-02        |
|                    |     |          | OR         | <b>0.80</b>    | <b>0.83</b>    | <b>0.80</b>    | 0.84           | 0.83           |
| HLA-F-AS1          | 6   | 29694378 | P          | 7.6e-02        | <b>8.8e-08</b> | 2.0e-04        | <b>1.5e-11</b> | <b>7.4e-07</b> |
|                    |     |          | Q          | 1              | <b>1.2e-03</b> | 0.75           | <b>8.6e-07</b> | <b>7.5e-03</b> |
|                    |     |          | OR         | 0.93           | <b>0.81</b>    | 0.86           | <b>0.76</b>    | <b>0.82</b>    |
| IFITM4P‡           | 6   | 29718506 | P          | <b>3.5e-07</b> | <b>2.3e-07</b> | <b>2.8e-07</b> | <b>6.0e-09</b> | <b>1.7e-08</b> |
|                    |     |          | Q          | <b>4.5e-03</b> | <b>2.8e-03</b> | <b>3.3e-03</b> | <b>1.5e-04</b> | <b>3.6e-04</b> |
|                    |     |          | OR         | <b>1.20</b>    | <b>1.21</b>    | <b>1.20</b>    | <b>1.24</b>    | <b>1.23</b>    |
| XXbac-BPG170G13.32 | 6   | 29719742 | P          | N/A            | <b>6.7e-08</b> | <b>8.4e-13</b> | N/A            | N/A            |
|                    |     |          | Q          | N/A            | <b>1.0e-03</b> | <b>5.4e-08</b> | N/A            | N/A            |
|                    |     |          | OR         | N/A            | <b>1.22</b>    | <b>1.30</b>    | N/A            | N/A            |
| HLA-K‡             | 6   | 29894236 | P          | <b>8.5e-17</b> | <b>6.4e-07</b> | <b>8.2e-09</b> | <b>4.0e-06</b> | 2.6e-03        |
|                    |     |          | Q          | <b>2.8e-11</b> | <b>7.2e-03</b> | <b>1.7e-04</b> | <b>3.9e-02</b> | 1              |
|                    |     |          | OR         | <b>1.37</b>    | <b>1.20</b>    | <b>1.24</b>    | <b>1.19</b>    | 1.11           |
| MICD‡              | 6   | 29938578 | P          | 7.7e-06        | <b>8.2e-12</b> | <b>5.1e-12</b> | <b>4.1e-14</b> | 2.6e-03        |
|                    |     |          | Q          | 6.8e-02        | <b>5.3e-07</b> | <b>2.7e-07</b> | <b>1.3e-08</b> | 1              |
|                    |     |          | OR         | 1.18           | <b>1.28</b>    | <b>1.29</b>    | <b>1.31</b>    | 1.11           |
| ZNRD1-AS1†         | 6   | 29968788 | P          | 2.9e-05        | <b>1.0e-07</b> | <b>5.1e-06</b> | 1.3e-03        | <b>8.5e-07</b> |
|                    |     |          | Q          | 0.19           | <b>1.4e-03</b> | <b>4.4e-02</b> | 1              | <b>8.4e-03</b> |
|                    |     |          | OR         | 1.16           | <b>1.22</b>    | <b>1.18</b>    | 1.12           | <b>1.20</b>    |
| HLA-J‡             | 6   | 29974360 | P          | <b>1.0e-08</b> | <b>7.1e-07</b> | <b>3.1e-08</b> | <b>3.5e-08</b> | <b>4.2e-07</b> |
|                    |     |          | Q          | <b>2.5e-04</b> | <b>7.7e-03</b> | <b>6.0e-04</b> | <b>6.8e-04</b> | <b>5.0e-03</b> |
|                    |     |          | OR         | <b>1.24</b>    | <b>1.20</b>    | <b>1.23</b>    | <b>1.23</b>    | <b>1.21</b>    |

continued on next page

**Table S1 – continued from previous page**

| Gene                  | Chr | Position | Statistics | Blood          | Nerve          | Lung           | Muscle         | Skin           |
|-----------------------|-----|----------|------------|----------------|----------------|----------------|----------------|----------------|
| ETF1P1 <sup>‡</sup>   | 6   | 29999490 | P          | 1.7e-04        | 1.0e-05        | <b>1.4e-10</b> | N/A            | <b>4.2e-11</b> |
|                       |     |          | Q          | 0.73           | 6.9e-02        | <b>5.3e-06</b> | N/A            | <b>2.3e-06</b> |
|                       |     |          | OR         | 1.15           | 1.19           | <b>1.27</b>    | N/A            | <b>1.28</b>    |
| RNF39                 | 6   | 30038043 | P          | <b>4.5e-08</b> | 3.8e-02        | <b>5.7e-16</b> | N/A            | <b>4.3e-09</b> |
|                       |     |          | Q          | <b>7.4e-04</b> | 1              | <b>1.8e-10</b> | N/A            | <b>1.0e-04</b> |
|                       |     |          | OR         | <b>1.22</b>    | 0.92           | <b>1.35</b>    | N/A            | <b>0.79</b>    |
| TRIM26                | 6   | 30152232 | P          | <b>4.4e-08</b> | 3.1e-02        | 1.3e-05        | <b>1.0e-07</b> | <b>1.0e-09</b> |
|                       |     |          | Q          | <b>7.4e-04</b> | 1              | 9.6e-02        | <b>1.5e-03</b> | <b>4.3e-05</b> |
|                       |     |          | OR         | <b>0.81</b>    | 1.08           | 0.84           | <b>1.22</b>    | <b>0.79</b>    |
| PAIP1P1 <sup>‡</sup>  | 6   | 30154575 | P          | <b>3.8e-07</b> | <b>3.6e-06</b> | 2.2e-04        | 0.51           | <b>1.2e-15</b> |
|                       |     |          | Q          | <b>4.8e-03</b> | <b>2.8e-02</b> | 0.79           | 1              | <b>4.1e-10</b> |
|                       |     |          | OR         | <b>1.22</b>    | <b>1.18</b>    | 0.86           | 1.02           | <b>1.34</b>    |
| HCG17                 | 6   | 30201816 | P          | 0.19           | <b>1.1e-06</b> | 2.3e-03        | <b>4.0e-07</b> | 8.5e-04        |
|                       |     |          | Q          | 1              | <b>1.0e-02</b> | 1              | <b>5.4e-03</b> | 1              |
|                       |     |          | OR         | 0.95           | <b>0.83</b>    | 0.89           | <b>0.82</b>    | 0.87           |
| XXbac-BPG249D20.9     | 6   | 30484043 | P          | <b>5.8e-14</b> | 9.7e-03        | <b>8.9e-08</b> | N/A            | 0.17           |
|                       |     |          | Q          | <b>9.4e-09</b> | 1              | <b>1.2e-03</b> | N/A            | 1              |
|                       |     |          | OR         | <b>1.33</b>    | 1.10           | <b>0.82</b>    | N/A            | 1.05           |
| GNL1                  | 6   | 30509154 | P          | 0.26           | 0.53           | 5.2e-05        | <b>2.6e-08</b> | <b>5.5e-08</b> |
|                       |     |          | Q          | 1              | 1              | 0.26           | <b>5.5e-04</b> | <b>8.6e-04</b> |
|                       |     |          | OR         | 1.04           | 0.97           | 1.16           | <b>1.23</b>    | <b>0.81</b>    |
| PRR3                  | 6   | 30524663 | P          | 0.28           | <b>4.9e-06</b> | <b>5.3e-08</b> | 0.31           | <b>1.0e-12</b> |
|                       |     |          | Q          | 1              | <b>3.6e-02</b> | <b>8.7e-04</b> | 1              | <b>8.3e-08</b> |
|                       |     |          | OR         | 0.96           | <b>0.83</b>    | <b>0.82</b>    | 0.96           | <b>0.76</b>    |
| PPP1R10               | 6   | 30568177 | P          | <b>1.6e-09</b> | 1.1e-03        | <b>2.8e-07</b> | 0.12           | 0.83           |
|                       |     |          | Q          | <b>5.9e-05</b> | 1              | <b>3.3e-03</b> | 1              | 1              |
|                       |     |          | OR         | <b>0.79</b>    | 0.88           | <b>0.82</b>    | 1.05           | 0.99           |
| HLA-C                 | 6   | 31236526 | P          | 2.1e-05        | 2.9e-05        | 3.4e-05        | <b>3.9e-06</b> | <b>5.6e-06</b> |
|                       |     |          | Q          | 0.15           | 0.16           | 0.19           | <b>3.9e-02</b> | <b>4.2e-02</b> |
|                       |     |          | OR         | 0.84           | 0.84           | 0.84           | <b>0.83</b>    | <b>0.83</b>    |
| NFKBIL1               | 6   | 31514647 | P          | 4.0e-03        | <b>7.7e-12</b> | 0.88           | 0.11           | <b>5.9e-07</b> |
|                       |     |          | Q          | 1              | <b>5.3e-07</b> | 1              | 1              | <b>6.7e-03</b> |
|                       |     |          | OR         | 0.89           | <b>0.76</b>    | 0.99           | 0.94           | <b>0.82</b>    |
| ABHD16A               | 6   | 31654726 | P          | <b>3.8e-09</b> | <b>4.2e-08</b> | 8.8e-02        | 5.5e-02        | 0.61           |
|                       |     |          | Q          | <b>1.2e-04</b> | <b>6.9e-04</b> | 1              | 1              | 1              |
|                       |     |          | OR         | <b>1.24</b>    | <b>1.22</b>    | 0.93           | 1.07           | 1.01           |
| STK19                 | 6   | 31938868 | P          | 1.1e-05        | <b>1.5e-07</b> | 4.0e-04        | <b>6.2e-08</b> | 8.1e-03        |
|                       |     |          | Q          | 9.3e-02        | <b>1.9e-03</b> | 1              | <b>1.0e-03</b> | 1              |
|                       |     |          | OR         | 0.85           | <b>0.81</b>    | 0.87           | <b>0.81</b>    | 1.10           |
| CYP21A1P <sup>‡</sup> | 6   | 31973413 | P          | <b>2.6e-13</b> | <b>4.2e-10</b> | <b>6.0e-14</b> | <b>7.6e-13</b> | <b>2.6e-15</b> |
|                       |     |          | Q          | <b>2.8e-08</b> | <b>1.2e-05</b> | <b>9.8e-09</b> | <b>1.1e-07</b> | <b>4.3e-10</b> |
|                       |     |          | OR         | <b>1.34</b>    | <b>1.28</b>    | <b>1.36</b>    | <b>1.34</b>    | <b>1.40</b>    |

continued on next page

**Table S1 – continued from previous page**

| Gene                   | Chr | Position | Statistics | Blood          | Nerve          | Lung           | Muscle         | Skin           |
|------------------------|-----|----------|------------|----------------|----------------|----------------|----------------|----------------|
| TNXB                   | 6   | 32008931 | P          | 0.25           | 4.5e-04        | 1.1e-02        | <b>2.4e-08</b> | <b>7.3e-07</b> |
|                        |     |          | Q          | 1              | 1              | 1              | <b>5.3e-04</b> | <b>7.5e-03</b> |
|                        |     |          | OR         | 1.04           | 0.87           | 1.10           | <b>0.80</b>    | <b>1.20</b>    |
| PRRT1                  | 6   | 32116136 | P          | 4.8e-03        | <b>5.9e-15</b> | 1.6e-05        | <b>1.1e-11</b> | <b>1.2e-06</b> |
|                        |     |          | Q          | 1              | <b>1.9e-09</b> | 0.11           | <b>8.6e-07</b> | <b>1.1e-02</b> |
|                        |     |          | OR         | 0.89           | <b>1.36</b>    | 1.17           | <b>1.29</b>    | <b>1.21</b>    |
| PPT2                   | 6   | 32121218 | P          | <b>1.5e-08</b> | <b>1.0e-06</b> | <b>3.5e-09</b> | 8.0e-04        | 4.6e-02        |
|                        |     |          | Q          | <b>3.4e-04</b> | <b>1.0e-02</b> | <b>8.2e-05</b> | 1              | 1              |
|                        |     |          | OR         | <b>0.80</b>    | <b>1.20</b>    | <b>1.24</b>    | 0.87           | 0.92           |
| XXbac-<br>BPG300A18.13 | 6   | 32152516 | P          | <b>8.2e-08</b> | <b>2.3e-06</b> | <b>7.8e-07</b> | 3.7e-05        | <b>5.9e-07</b> |
|                        |     |          | Q          | <b>1.2e-03</b> | <b>2.1e-02</b> | <b>8.5e-03</b> | 0.22           | <b>6.7e-03</b> |
|                        |     |          | OR         | <b>0.80</b>    | <b>0.82</b>    | <b>0.81</b>    | 0.85           | <b>0.81</b>    |
| HLA-DRA †              | 6   | 32407619 | P          | <b>1.2e-06</b> | 1.6e-03        | <b>1.1e-06</b> | 2.1e-03        | 0.83           |
|                        |     |          | Q          | <b>1.3e-02</b> | 1              | <b>1.1e-02</b> | 1              | 1              |
|                        |     |          | OR         | <b>0.83</b>    | 1.12           | <b>0.82</b>    | 1.12           | 1.00           |
| HLA-DRB6               | 6   | 32520490 | P          | <b>9.9e-09</b> | <b>2.1e-10</b> | <b>1.1e-07</b> | <b>1.8e-09</b> | <b>7.2e-09</b> |
|                        |     |          | Q          | <b>2.4e-04</b> | <b>7.0e-06</b> | <b>1.5e-03</b> | <b>5.6e-05</b> | <b>1.5e-04</b> |
|                        |     |          | OR         | <b>1.24</b>    | <b>1.27</b>    | <b>1.22</b>    | <b>1.25</b>    | <b>1.24</b>    |
| HLA-DRB1 †             | 6   | 32546546 | P          | <b>3.1e-10</b> | <b>4.6e-10</b> | <b>1.7e-09</b> | <b>3.5e-10</b> | <b>1.3e-09</b> |
|                        |     |          | Q          | <b>1.6e-05</b> | <b>1.2e-05</b> | <b>4.7e-05</b> | <b>1.4e-05</b> | <b>4.5e-05</b> |
|                        |     |          | OR         | <b>0.77</b>    | <b>0.77</b>    | <b>0.78</b>    | <b>0.77</b>    | <b>0.78</b>    |
| HLA-DQA2               | 6   | 32709119 | P          | <b>2.3e-10</b> | <b>7.5e-11</b> | <b>6.1e-12</b> | <b>1.4e-09</b> | <b>2.2e-07</b> |
|                        |     |          | Q          | <b>1.5e-05</b> | <b>3.0e-06</b> | <b>2.8e-07</b> | <b>4.7e-05</b> | <b>2.9e-03</b> |
|                        |     |          | OR         | <b>1.2</b>     | <b>1.27</b>    | <b>1.29</b>    | <b>1.25</b>    | <b>1.21</b>    |
| HLA-DMA                | 6   | 32916390 | P          | <b>2.6e-07</b> | 0.15           | 2.7e-02        | 4.9e-05        | <b>4.1e-06</b> |
|                        |     |          | Q          | <b>3.5e-03</b> | 1              | 1              | 0.28           | <b>3.2e-02</b> |
|                        |     |          | OR         | <b>0.81</b>    | 0.94           | 1.08           | 0.85           | <b>0.82</b>    |
| RING1                  | 6   | 33176272 | P          | 5.1e-02        | <b>1.0e-10</b> | 1.8e-02        | 8.0e-03        | <b>7.0e-06</b> |
|                        |     |          | Q          | 1              | <b>3.9e-06</b> | 1              | 1              | <b>4.9e-02</b> |
|                        |     |          | OR         | 1.07           | <b>1.26</b>    | 1.09           | 0.90           | <b>1.18</b>    |
| B3GALT4                | 6   | 33244917 | P          | 0.10           | 0.32           | <b>1.3e-08</b> | 5.9e-02        | <b>1.3e-07</b> |
|                        |     |          | Q          | 1              | 1              | <b>2.7e-04</b> | 1              | <b>1.9e-03</b> |
|                        |     |          | OR         | 0.94           | 1.03           | <b>1.23</b>    | 1.07           | <b>0.82</b>    |

Table S2: **Vitiligo associated genes.** P: p-values; Q: adjusted p-values using BHY procedure; OR: odds ratio. Position is the transcript start site in HG19. Table include genes (transcripts) that are significant ( $Q < 0.05$ ) in at least one tissue.

| Gene               | Chr | Position  | Statistics | Blood   | Nerve    | Lung    | Muscle  | Skin     |
|--------------------|-----|-----------|------------|---------|----------|---------|---------|----------|
| RP5-1115A15.1      | 1   | 8484705   | P          | 0.23    | 4.91e-06 | 2.1e-05 | 9.8e-05 | 9.1e-06  |
|                    |     |           | Q          | 1       | 3.6e-02  | 0.13    | 0.49    | 6.1e-02  |
|                    |     |           | OR         | 0.95    | 0.84     | 0.85    | 0.86    | 0.84     |
| LPP-AS2            | 3   | 187868994 | P          | 7.3e-02 | 3.8e-02  | 0.23    | 3.6e-03 | 6.0e-06  |
|                    |     |           | Q          | 1       | 1        | 1       | 1       | 4.4e-02  |
|                    |     |           | OR         | 0.93    | 1.07     | 0.95    | 1.14    | 1.18     |
| MAS1LP1            | 6   | 29442802  | P          | N/A     | 0.23     | 9.0e-03 | N/A     | 2.5e-06  |
|                    |     |           | Q          | N/A     | 1        | 1       | N/A     | 2.0e-02  |
|                    |     |           | OR         | N/A     | 0.95     | 1.13    | N/A     | 0.83     |
| RPS17P1            | 6   | 29457048  | P          | N/A     | 0.62     | 1.1e-02 | 8.5e-08 | 3.9e-08  |
|                    |     |           | Q          | N/A     | 1        | 1       | 1.3e-03 | 6.7e-04  |
|                    |     |           | OR         | N/A     | 0.98     | 1.09    | 1.22    | 0.80     |
| XXbac-BPG13B8.10   | 6   | 29465286  | P          | N/A     | 4.4e-03  | 1.0e-02 | 0.20    | 4.3e-12  |
|                    |     |           | Q          | N/A     | 1        | 1       | 1       | 2.8e-07  |
|                    |     |           | OR         | N/A     | 0.89     | 1.09    | 0.95    | 0.76     |
| GABBR1             | 6   | 29523406  | P          | 0.48    | 2.7e-11  | 4.3e-04 | 2.2e-05 | 3.2e-06  |
|                    |     |           | Q          | 1       | 1.2e-06  | 1       | 0.16    | 2.6e-02  |
|                    |     |           | OR         | 1.02    | 1.28     | 0.87    | 1.17    | 1.18     |
| OR2H2              | 6   | 29555683  | P          | 0.15    | 0.18     | 1.5e-03 | N/A     | 1.38e-06 |
|                    |     |           | Q          | 1       | 1        | 1       | N/A     | 1.1e-02  |
|                    |     |           | OR         | 0.94    | 0.95     | 0.88    | N/A     | 0.83     |
| MOG                | 6   | 29624758  | P          | 2.1e-07 | 4.0e-04  | 0.27    | 3.2e-11 | 1.6e-02  |
|                    |     |           | Q          | 3.0e-03 | 1        | 1       | 1.4e-06 | 1        |
|                    |     |           | OR         | 0.81    | 1.14     | 1.04    | 1.29    | 0.91     |
| ZFP57              | 6   | 29640169  | P          | 4.0e-08 | 4.9e-06  | 4.5e-08 | 2.6e-05 | 7.34e-06 |
|                    |     |           | Q          | 7.3e-04 | 3.6e-02  | 7.8e-04 | 0.17    | 5.1e-02  |
|                    |     |           | OR         | 0.80    | 0.83     | 0.80    | 0.84    | 0.83     |
| HLA-F-AS1          | 6   | 29694378  | P          | 7.6e-02 | 8.8e-08  | 2.0e-04 | 1.5e-11 | 7.4e-07  |
|                    |     |           | Q          | 1       | 1.2e-03  | 0.75    | 8.6e-07 | 7.5e-03  |
|                    |     |           | OR         | 0.93    | 0.81     | 0.86    | 0.76    | 0.82     |
| IFITM4P            | 6   | 29718506  | P          | 3.5e-07 | 2.3e-07  | 2.8e-07 | 6.0e-09 | 1.7e-08  |
|                    |     |           | Q          | 4.5e-03 | 2.8e-03  | 3.3e-03 | 1.5e-04 | 3.6e-04  |
|                    |     |           | OR         | 1.20    | 1.21     | 1.20    | 1.24    | 1.23     |
| XXbac-BPG170G13.32 | 6   | 29719742  | P          | N/A     | 6.7e-08  | 8.4e-13 | N/A     | N/A      |
|                    |     |           | Q          | N/A     | 1.0e-03  | 5.4e-08 | N/A     | N/A      |
|                    |     |           | OR         | N/A     | 1.22     | 1.30    | N/A     | N/A      |
| HLA-K              | 6   | 29894236  | P          | 8.5e-17 | 6.4e-07  | 8.2e-09 | 4.0e-06 | 2.6e-03  |
|                    |     |           | Q          | 2.8e-11 | 7.2e-03  | 1.7e-04 | 3.9e-02 | 1        |
|                    |     |           | OR         | 1.37    | 1.20     | 1.24    | 1.19    | 1.11     |

continued on next page



**Table S2 – continued from previous page**

| Gene       | Chr | Position | Statistics | Blood   | Nerve   | Lung    | Muscle  | Skin    |
|------------|-----|----------|------------|---------|---------|---------|---------|---------|
| HCG4P5     | 6   | 29909852 | P          | 5.1e-03 | 3.3e-06 | 9.7e-06 | 2.4e-04 | 1.2e-04 |
|            |     |          | Q          | 1       | 2.7e-02 | 7.7e-02 | 1       | 0.53    |
|            |     |          | OR         | 0.89    | 0.83    | 0.84    | 0.86    | 0.86    |
| MICD       | 6   | 29938578 | P          | 7.7e-06 | 8.2e-12 | 5.1e-12 | 4.1e-14 | 2.6e-03 |
|            |     |          | Q          | 6.8e-02 | 5.3e-07 | 2.7e-07 | 1.3e-08 | 1       |
|            |     |          | OR         | 1.18    | 1.28    | 1.29    | 1.31    | 1.11    |
| HCG9       | 6   | 29942889 | P          | 6.7e-04 | 0.18    | 2.6e-13 | 2.6e-02 | N/A     |
|            |     |          | Q          | 1       | 1       | 2.2e-08 | 1       | N/A     |
|            |     |          | OR         | 1.13    | 1.05    | 0.75    | 0.92    | N/A     |
| DDX39BP2   | 6   | 29960986 | P          | 0.18    | 5.2e-07 | N/A     | N/A     | N/A     |
|            |     |          | Q          | 1       | 6.1e-03 | N/A     | N/A     | N/A     |
|            |     |          | OR         | 0.95    | 0.82    | N/A     | N/A     | N/A     |
| ZNRD1-AS1  | 6   | 29968788 | P          | 2.9e-05 | 1.0e-07 | 5.1e-06 | 1.3e-03 | 8.5e-07 |
|            |     |          | Q          | 0.19    | 1.4e-03 | 4.4e-02 | 1       | 8.4e-03 |
|            |     |          | OR         | 1.16    | 1.22    | 1.18    | 1.12    | 1.20    |
| HLA-J      | 6   | 29974360 | P          | 1.0e-08 | 7.1e-07 | 3.1e-08 | 3.5e-08 | 4.2e-07 |
|            |     |          | Q          | 2.5e-04 | 7.7e-03 | 6.0e-04 | 6.8e-04 | 5.0e-03 |
|            |     |          | OR         | 1.24    | 1.20    | 1.23    | 1.23    | 1.21    |
| ETF1P1     | 6   | 29999490 | P          | 1.7e-04 | 1.0e-05 | 1.4e-10 | N/A     | 4.2e-11 |
|            |     |          | Q          | 0.73    | 6.9e-02 | 5.3e-06 | N/A     | 2.3e-06 |
|            |     |          | OR         | 1.15    | 1.19    | 1.27    | N/A     | 1.28    |
| PPP1R11    | 6   | 30034486 | P          | 3.5e-02 | 0.33    | 4.5e-04 | 2.9e-02 | 2.5e-07 |
|            |     |          | Q          | 1       | 1       | 1       | 1       | 3.2e-03 |
|            |     |          | OR         | 1.08    | 1.03    | 0.87    | 1.08    | 1.21    |
| RNF39      | 6   | 30038043 | P          | 4.5e-08 | 3.8e-02 | 5.7e-16 | N/A     | 4.3e-09 |
|            |     |          | Q          | 7.4e-04 | 1       | 1.8e-10 | N/A     | 1.0e-04 |
|            |     |          | OR         | 1.22    | 0.92    | 1.35    | N/A     | 0.79    |
| TRIM31     | 6   | 30070674 | P          | N/A     | N/A     | 2.7e-13 | N/A     | 1.4e-05 |
|            |     |          | Q          | N/A     | N/A     | 2.2e-08 | N/A     | 9.2e-02 |
|            |     |          | OR         | N/A     | N/A     | 1.32    | N/A     | 1.18    |
| TRIM31-AS1 | 6   | 30073017 | P          | N/A     | N/A     | 2.4e-07 | N/A     | 3.9e-03 |
|            |     |          | Q          | N/A     | N/A     | 3.0e-03 | N/A     | 1       |
|            |     |          | OR         | N/A     | N/A     | 1.22    | N/A     | 0.89    |
| TRIM15     | 6   | 30130993 | P          | 4.9e-03 | N/A     | 1.6e-02 | N/A     | 3.5e-08 |
|            |     |          | Q          | 1       | N/A     | 1       | N/A     | 6.3e-04 |
|            |     |          | OR         | 0.90    | N/A     | 1.09    | N/A     | 1.23    |
| TRIM26     | 6   | 30152232 | P          | 4.4e-08 | 3.1e-02 | 1.3e-05 | 1.0e-07 | 1.0e-09 |
|            |     |          | Q          | 7.4e-04 | 1       | 9.6e-02 | 1.5e-03 | 4.3e-05 |
|            |     |          | OR         | 0.81    | 1.08    | 0.84    | 1.22    | 0.79    |
| PAIP1P1    | 6   | 30154575 | P          | 3.8e-07 | 3.6e-06 | 2.2e-04 | 0.51    | 1.2e-15 |
|            |     |          | Q          | 4.8e-03 | 2.8e-02 | 0.79    | 1       | 4.1e-10 |
|            |     |          | OR         | 1.22    | 1.18    | 0.86    | 1.02    | 1.34    |

continued on next page

**Table S2 – continued from previous page**

| Gene              | Chr | Position | Statistics | Blood   | Nerve   | Lung    | Muscle  | Skin    |
|-------------------|-----|----------|------------|---------|---------|---------|---------|---------|
| HCG17             | 6   | 30201816 | P          | 0.19    | 1.1e-06 | 2.3e-03 | 4.0e-07 | 8.5e-04 |
|                   |     |          | Q          | 1       | 1.0e-02 | 1       | 5.4e-03 | 1       |
|                   |     |          | OR         | 0.95    | 0.83    | 0.89    | 0.82    | 0.87    |
| SUCLA2P1          | 6   | 30436659 | P          | N/A     | N/A     | N/A     | 3.2e-06 | N/A     |
|                   |     |          | Q          | N/A     | N/A     | N/A     | 3.4e-02 | N/A     |
|                   |     |          | OR         | N/A     | N/A     | N/A     | 1.19    | N/A     |
| RANP1             | 6   | 30453717 | P          | 2.1e-08 | 0.16    | 4.4e-02 | 4.1e-02 | 0.89    |
|                   |     |          | Q          | 4.4e-04 | 1       | 1       | 1       | 1       |
|                   |     |          | OR         | 1.23    | 1.05    | 0.92    | 1.08    | 1.00    |
| HLA-E             | 6   | 30457244 | P          | 9.2e-02 | 0.36    | 1.1e-10 | 0.77    | 5.4e-05 |
|                   |     |          | Q          | 1       | 1       | 4.6e-06 | 1       | 0.26    |
|                   |     |          | OR         | 1.06    | 1.03    | 1.27    | 0.98    | 0.85    |
| XXbac-BPG249D20.9 | 6   | 30484043 | P          | 5.8e-14 | 9.7e-03 | 8.9e-08 | N/A     | 0.17    |
|                   |     |          | Q          | 9.4e-09 | 1       | 1.2e-03 | N/A     | 1       |
|                   |     |          | OR         | 1.33    | 1.10    | 0.82    | N/A     | 1.05    |
| GNL1              | 6   | 30509154 | P          | 0.26    | 0.53    | 5.2e-05 | 2.6e-08 | 5.5e-08 |
|                   |     |          | Q          | 1       | 1       | 0.26    | 5.5e-04 | 8.6e-04 |
|                   |     |          | OR         | 1.04    | 0.97    | 1.16    | 1.23    | 0.81    |
| PRR3              | 6   | 30524663 | P          | 0.28    | 4.9e-06 | 5.3e-08 | 0.31    | 1.0e-12 |
|                   |     |          | Q          | 1       | 3.6e-02 | 8.7e-04 | 1       | 8.3e-08 |
|                   |     |          | OR         | 0.96    | 0.83    | 0.82    | 0.96    | 0.76    |
| ABCF1             | 6   | 30539153 | P          | 6.4e-09 | 0.65    | 0.72    | 2.7e-02 | 3.6e-03 |
|                   |     |          | Q          | 1.9e-04 | 1       | 1       | 1       | 1       |
|                   |     |          | OR         | 0.80    | 0.98    | 0.98    | 0.92    | 0.89    |
| PPP1R10           | 6   | 30568177 | P          | 1.6e-09 | 1.1e-03 | 2.8e-07 | 0.12    | 0.83    |
|                   |     |          | Q          | 5.9e-05 | 1       | 3.3e-03 | 1       | 1       |
|                   |     |          | OR         | 0.79    | 0.88    | 0.82    | 1.05    | 0.99    |
| ATAT1             | 6   | 30594619 | P          | 0.69    | 0.17    | 2.3e-07 | 3.3e-05 | 0.32    |
|                   |     |          | Q          | 1       | 1       | 3.0e-03 | 0.21    | 1       |
|                   |     |          | OR         | 1.01    | 1.05    | 0.82    | 1.16    | 0.96    |
| HCG20             | 6   | 30734602 | P          | 5.9e-03 | 5.4e-09 | 3.0e-03 | N/A     | 4.2e-03 |
|                   |     |          | Q          | 1       | 1.1e-04 | 1       | N/A     | 1       |
|                   |     |          | OR         | 1.10    | 1.24    | 1.11    | N/A     | 1.11    |
| HLA-C             | 6   | 31236526 | P          | 2.1e-05 | 2.9e-05 | 3.4e-05 | 3.9e-06 | 5.6e-06 |
|                   |     |          | Q          | 0.15    | 0.16    | 0.19    | 3.9e-02 | 4.2e-02 |
|                   |     |          | OR         | 0.84    | 0.84    | 0.84    | 0.83    | 0.83    |
| RPL3P2            | 6   | 31248094 | P          | 9.5e-02 | 0.91    | 1.5e-04 | 2.2e-02 | 2.3e-09 |
|                   |     |          | Q          | 1       | 1       | 0.61    | 1       | 5.8e-05 |
|                   |     |          | OR         | 1.06    | 0.99    | 0.86    | 0.91    | 1.24    |
| HCP5              | 6   | 31368479 | P          | 4.1e-10 | 1.4e-03 | 2.4e-05 | 3.0e-04 | 2.4e-05 |
|                   |     |          | Q          | 1.7e-05 | 1       | 0.14    | 1       | 0.15    |
|                   |     |          | OR         | 1.26    | 1.12    | 1.18    | 1.14    | 1.17    |

continued on next page

**Table S2 – continued from previous page**

| Gene        | Chr | Position | Statistics | Blood   | Nerve   | Lung    | Muscle  | Skin    |
|-------------|-----|----------|------------|---------|---------|---------|---------|---------|
| NFKBIL1     | 6   | 31514647 | P          | 4.0e-03 | 7.7e-12 | 0.88    | 0.11    | 5.9e-07 |
|             |     |          | Q          | 1       | 5.3e-07 | 1       | 1       | 6.7e-03 |
|             |     |          | OR         | 0.89    | 0.76    | 0.99    | 0.94    | 0.82    |
| BAG6        | 6   | 31606805 | P          | 8.3e-05 | 3.3e-05 | 0.22    | 2.3e-08 | 5.1e-04 |
|             |     |          | Q          | 0.44    | 0.18    | 1       | 5.3e-04 | 1       |
|             |     |          | OR         | 1.15    | 1.16    | 1.04    | 1.25    | 1.14    |
| C6orf47-AS1 | 6   | 31626106 | P          | 4.9e-02 | 8.1e-04 | 0.55    | 0.43    | 2.6e-10 |
|             |     |          | Q          | 1       | 1       | 1       | 1       | 1.2e-05 |
|             |     |          | OR         | 0.92    | 0.88    | 1.02    | 0.97    | 0.78    |
| ABHD16A     | 6   | 31654726 | P          | 3.8e-09 | 4.2e-08 | 8.8e-02 | 5.5e-02 | 0.61    |
|             |     |          | Q          | 1.2e-04 | 6.9e-04 | 1       | 1       | 1       |
|             |     |          | OR         | 1.24    | 1.22    | 0.93    | 1.07    | 1.01    |
| LY6G6C      | 6   | 31686425 | P          | 0.93    | 9.5e-07 | 0.19    | 0.56    | 4.9e-02 |
|             |     |          | Q          | 1       | 9.8e-03 | 1       | 1       | 1       |
|             |     |          | OR         | 0.99    | 1.20    | 0.95    | 1.02    | 0.92    |
| DDAH2       | 6   | 31694815 | P          | 0.32    | 4.7e-04 | 8.6e-02 | 0.43    | 5.6e-06 |
|             |     |          | Q          | 1       | 1       | 1       | 1       | 4.2e-02 |
|             |     |          | OR         | 0.96    | 1.14    | 1.06    | 1.03    | 1.19    |
| SAPCD1-AS1  | 6   | 31732087 | P          | 0.24    | 2.3e-08 | 0.16    | 0.70    | 0.22    |
|             |     |          | Q          | 1       | 4.3e-04 | 1       | 1       | 1       |
|             |     |          | OR         | 0.95    | 1.23    | 0.94    | 0.98    | 0.95    |
| C6orf48     | 6   | 31802385 | P          | 0.49    | 6.1e-02 | 5.5e-04 | 7.6e-08 | N/A     |
|             |     |          | Q          | 1       | 1       | 1       | 1.2e-03 | N/A     |
|             |     |          | OR         | 1.02    | 1.07    | 1.14    | 1.23    | N/A     |
| SNORD48     | 6   | 31803040 | P          | 0.90    | 0.10    | 0.19    | 1.4e-11 | N/A     |
|             |     |          | Q          | 1       | 1       | 1       | 8.6e-07 | N/A     |
|             |     |          | OR         | 1.00    | 1.06    | 1.05    | 1.28    | N/A     |
| NEU1        | 6   | 31825436 | P          | 0.13    | 7.9e-08 | 1.5e-05 | 0.51    | N/A     |
|             |     |          | Q          | 1       | 1.1e-03 | 0.11    | 1       | N/A     |
|             |     |          | OR         | 1.05    | 1.22    | 1.17    | 0.97    | N/A     |
| SLC44A4     | 6   | 31830969 | P          | 4.0e-07 | 1.7e-02 | 8.7e-02 | 0.25    | N/A     |
|             |     |          | Q          | 4.8e-03 | 1       | 1       | 1       | N/A     |
|             |     |          | OR         | 0.81    | 0.91    | 1.06    | 0.95    | N/A     |
| EHMT2-AS1   | 6   | 31851538 | P          | N/A     | 6.0e-05 | 4.2e-08 | N/A     | N/A     |
|             |     |          | Q          | N/A     | 0.28    | 7.6e-04 | N/A     | N/A     |
|             |     |          | OR         | N/A     | 1.16    | 0.80    | N/A     | N/A     |
| ZBTB12      | 6   | 31867384 | P          | N/A     | 2.3e-08 | 3.0e-04 | N/A     | N/A     |
|             |     |          | Q          | N/A     | 4.3e-04 | 0.97    | N/A     | N/A     |
|             |     |          | OR         | N/A     | 0.80    | 1.14    | N/A     | N/A     |
| CFB         | 6   | 31895475 | P          | 4.2e-02 | 1.5e-03 | 6.3e-05 | 2.4e-07 | N/A     |
|             |     |          | Q          | 1       | 1       | 0.30    | 3.4e-03 | N/A     |
|             |     |          | OR         | 1.07    | 1.12    | 1.16    | 1.22    | N/A     |

continued on next page

**Table S2 – continued from previous page**

| Gene                   | Chr | Position | Statistics | Blood   | Nerve   | Lung    | Muscle  | Skin    |
|------------------------|-----|----------|------------|---------|---------|---------|---------|---------|
| STK19                  | 6   | 31938868 | P          | 1.1e-05 | 1.5e-07 | 4.0e-04 | 6.2e-08 | 8.1e-03 |
|                        |     |          | Q          | 9.3e-02 | 1.9e-03 | 1       | 1.0e-03 | 1       |
|                        |     |          | OR         | 0.85    | 0.81    | 0.87    | 0.81    | 1.10    |
| CYP21A1P               | 6   | 31973413 | P          | 2.6e-13 | 4.2e-10 | 6.0e-14 | 7.6e-13 | 2.6e-15 |
|                        |     |          | Q          | 2.8e-08 | 1.2e-05 | 9.8e-09 | 1.1e-07 | 4.3e-10 |
|                        |     |          | OR         | 1.34    | 1.28    | 1.36    | 1.34    | 1.40    |
| TNXA                   | 6   | 31976391 | P          | 0.56    | 0.59    | 3.4e-04 | 1.0e-12 | 4.8e-03 |
|                        |     |          | Q          | 1       | 1       | 1       | 1.1e-07 | 1       |
|                        |     |          | OR         | 1.02    | 0.98    | 1.14    | 1.31    | 1.10    |
| C4B                    | 6   | 31982539 | P          | 7.3e-03 | 1.1e-09 | 3.1e-02 | 0.25    | 2.4e-04 |
|                        |     |          | Q          | 1       | 3.0e-05 | 1       | 1       | 0.85    |
|                        |     |          | OR         | 0.89    | 0.79    | 0.92    | 0.95    | 0.86    |
| CYP21A2                | 6   | 32006042 | P          | 5.7e-08 | 0.55    | 6.7e-04 | 8.7e-03 | 0.24    |
|                        |     |          | Q          | 8.8e-04 | 1       | 1       | 1       | 1       |
|                        |     |          | OR         | 0.80    | 1.02    | 1.14    | 0.90    | 0.95    |
| TNXB                   | 6   | 32008931 | P          | 0.25    | 4.5e-04 | 1.1e-02 | 2.4e-08 | 7.3e-07 |
|                        |     |          | Q          | 1       | 1       | 1       | 5.3e-04 | 7.5e-03 |
|                        |     |          | OR         | 1.04    | 0.87    | 1.10    | 0.80    | 1.20    |
| FKBPL                  | 6   | 32096484 | P          | 0.72    | 2.4e-06 | 1.6e-05 | 4.6e-03 | 7.2e-02 |
|                        |     |          | Q          | 1       | 2.1e-02 | 0.11    | 1       | 1       |
|                        |     |          | OR         | 0.98    | 0.83    | 0.84    | 0.89    | 0.93    |
| PRRT1                  | 6   | 32116136 | P          | 4.8e-03 | 5.9e-15 | 1.6e-05 | 1.1e-11 | 1.2e-06 |
|                        |     |          | Q          | 1       | 1.9e-09 | 0.11    | 8.6e-07 | 1.1e-02 |
|                        |     |          | OR         | 0.89    | 1.36    | 1.17    | 1.29    | 1.21    |
| PPT2                   | 6   | 32121218 | P          | 1.5e-08 | 1.0e-06 | 3.5e-09 | 8.0e-04 | 4.6e-02 |
|                        |     |          | Q          | 3.4e-04 | 1.0e-02 | 8.2e-05 | 1       | 1       |
|                        |     |          | OR         | 0.80    | 1.20    | 1.24    | 0.87    | 0.92    |
| RNF5                   | 6   | 32146131 | P          | 1.3e-03 | 2.7e-12 | 1.3e-02 | 2.7e-02 | 1.6e-02 |
|                        |     |          | Q          | 1       | 4.5e-07 | 1       | 1       | 1       |
|                        |     |          | OR         | 0.88    | 1.29    | 1.09    | 1.08    | 1.09    |
| AGER                   | 6   | 32148745 | P          | 0.14    | 0.10    | 1.4e-09 | 7.8e-02 | 0.69    |
|                        |     |          | Q          | 1       | 1       | 4.7e-05 | 1       | 1       |
|                        |     |          | OR         | 0.94    | 0.94    | 0.79    | 1.06    | 1.01    |
| PBX2                   | 6   | 32152512 | P          | 0.37    | 5.3e-12 | 1.0e-02 | 0.83    | 1.4e-02 |
|                        |     |          | Q          | 1       | 5.3e-07 | 1       | 1       | 1       |
|                        |     |          | OR         | 0.96    | 1.29    | 1.09    | 1.00    | 0.91    |
| XXbac-<br>BPG300A18.13 | 6   | 32152516 | P          | 8.2e-08 | 2.3e-06 | 7.8e-07 | 3.7e-05 | 5.9e-07 |
|                        |     |          | Q          | 1.2e-03 | 2.1e-02 | 8.5e-03 | 0.22    | 6.7e-03 |
|                        |     |          | OR         | 0.80    | 0.82    | 0.81    | 0.85    | 0.81    |
| NOTCH4                 | 6   | 32162620 | P          | 2.3e-03 | 1.7e-02 | 1.2e-03 | 2.8e-06 | 5.2e-05 |
|                        |     |          | Q          | 1       | 1       | 1       | 3.1e-02 | 0.26    |
|                        |     |          | OR         | 0.89    | 1.09    | 1.13    | 1.19    | 1.16    |

continued on next page

**Table S2 – continued from previous page**

| Gene                   | Chr | Position | Statistics | Blood   | Nerve   | Lung    | Muscle  | Skin    |
|------------------------|-----|----------|------------|---------|---------|---------|---------|---------|
| HLA-DRA                | 6   | 32407619 | P          | 1.2e-06 | 1.6e-03 | 1.1e-06 | 2.1e-03 | 0.83    |
|                        |     |          | Q          | 1.3e-02 | 1       | 1.1e-02 | 1       | 1       |
|                        |     |          | OR         | 0.83    | 1.12    | 0.82    | 1.12    | 1.00    |
| HLA-DRB9               | 6   | 32427598 | P          | N/A     | N/A     | N/A     | N/A     | 1.6e-09 |
|                        |     |          | Q          | N/A     | N/A     | N/A     | N/A     | 4.5e-05 |
|                        |     |          | OR         | N/A     | N/A     | N/A     | N/A     | 1.25    |
| HLA-DRB6               | 6   | 32520490 | P          | 9.9e-09 | 2.1e-10 | 1.1e-07 | 1.8e-09 | 7.2e-09 |
|                        |     |          | Q          | 2.4e-04 | 7.0e-06 | 1.5e-03 | 5.6e-05 | 1.5e-04 |
|                        |     |          | OR         | 1.24    | 1.27    | 1.22    | 1.25    | 1.24    |
| HLA-DRB1               | 6   | 32546546 | P          | 3.1e-10 | 4.6e-10 | 1.7e-09 | 3.5e-10 | 1.3e-09 |
|                        |     |          | Q          | 1.6e-05 | 1.2e-05 | 4.7e-05 | 1.4e-05 | 4.5e-05 |
|                        |     |          | OR         | 0.77    | 0.77    | 0.78    | 0.77    | 0.78    |
| HLA-DQA2               | 6   | 32709119 | P          | 2.3e-10 | 7.5e-11 | 6.1e-12 | 1.4e-09 | 2.2e-07 |
|                        |     |          | Q          | 1.5e-05 | 3.0e-06 | 2.8e-07 | 4.7e-05 | 2.9e-03 |
|                        |     |          | OR         | 1.2     | 1.27    | 1.29    | 1.25    | 1.21    |
| AL645941.1             | 6   | 32904693 | P          | 2.6e-05 | 0.27    | 1.7e-03 | N/A     | 4.1e-08 |
|                        |     |          | Q          | 0.17    | 1       | 1       | N/A     | 6.7e-04 |
|                        |     |          | OR         | 1.17    | 1.04    | 0.88    | N/A     | 0.81    |
| HLA-DMA                | 6   | 32916390 | P          | 2.6e-07 | 0.15    | 2.7e-02 | 4.9e-05 | 4.1e-06 |
|                        |     |          | Q          | 3.5e-03 | 1       | 1       | 0.28    | 3.2e-02 |
|                        |     |          | OR         | 0.81    | 0.94    | 1.08    | 0.85    | 0.82    |
| BRD2                   | 6   | 32936437 | P          | 2.6e-02 | 2.2e-02 | 0.43    | 0.50    | 1.5e-09 |
|                        |     |          | Q          | 1       | 1       | 1       | 1       | 4.5e-05 |
|                        |     |          | OR         | 1.08    | 1.08    | 1.03    | 0.97    | 1.25    |
| COL11A2                | 6   | 33130458 | P          | 0.70    | 8.4e-02 | 2.1e-06 | 0.17    | 4.9e-03 |
|                        |     |          | Q          | 1       | 1       | 2.0e-02 | 1       | 1       |
|                        |     |          | OR         | 0.98    | 1.06    | 0.83    | 0.95    | 0.89    |
| RXRB                   | 6   | 33161365 | P          | 1.0e-12 | 0.11    | 0.15    | 0.84    | 1.8e-02 |
|                        |     |          | Q          | 8.8e-08 | 1       | 1       | 1       | 1       |
|                        |     |          | OR         | 0.76    | 0.94    | 0.94    | 0.99    | 0.91    |
| SLC39A7                | 6   | 33168222 | P          | 0.36    | 9.8e-05 | 0.35    | 2.0e-06 | 2.3e-02 |
|                        |     |          | Q          | 1       | 0.43    | 1       | 2.4e-02 | 1       |
|                        |     |          | OR         | 1.03    | 1.15    | 0.96    | 0.83    | 0.91    |
| RING1                  | 6   | 33176272 | P          | 5.1e-02 | 1.0e-10 | 1.8e-02 | 8.0e-03 | 7.0e-06 |
|                        |     |          | Q          | 1       | 3.9e-06 | 1       | 1       | 4.9e-02 |
|                        |     |          | OR         | 1.07    | 1.26    | 1.09    | 0.90    | 1.18    |
| XXbac-<br>BPG157A10.21 | 6   | 33213852 | P          | 2.6e-04 | 1.2e-11 | 6.1e-04 | 3.8e-04 | 6.7e-02 |
|                        |     |          | Q          | 0.99    | 6.9e-07 | 1       | 1       | 1       |
|                        |     |          | OR         | 0.87    | 1.28    | 0.88    | 1.14    | 1.07    |
| HCG25                  | 6   | 33217311 | P          | 4.9e-03 | 2.6e-04 | 0.26    | 7.3e-02 | 1.0e-06 |
|                        |     |          | Q          | 1       | 0.86    | 1       | 1       | 1.0e-02 |
|                        |     |          | OR         | 1.10    | 0.87    | 1.04    | 0.93    | 0.83    |

continued on next page

**Table S2 – continued from previous page**

| Gene         | Chr | Position  | Statistics | Blood   | Nerve   | Lung    | Muscle  | Skin    |
|--------------|-----|-----------|------------|---------|---------|---------|---------|---------|
| VPS52        | 6   | 33218049  | P          | 6.6e-03 | 0.23    | 0.65    | 0.65    | 6.6e-15 |
|              |     |           | Q          | 1       | 1       | 1       | 1       | 7.2e-10 |
|              |     |           | OR         | 0.90    | 1.04    | 0.98    | 0.98    | 0.74    |
| B3GALT4      | 6   | 33244917  | P          | 0.10    | 0.32    | 1.3e-08 | 5.9e-02 | 1.3e-07 |
|              |     |           | Q          | 1       | 1       | 2.7e-04 | 1       | 1.9e-03 |
|              |     |           | OR         | 0.94    | 1.03    | 1.23    | 1.07    | 0.82    |
| TAPBP        | 6   | 33267471  | P          | 3.9e-10 | 0.82    | 0.29    | 0.24    | 0.15    |
|              |     |           | Q          | 1.7e-05 | 1       | 1       | 1       | 1       |
|              |     |           | OR         | 1.26    | 0.99    | 0.96    | 0.95    | 0.94    |
| DAXX         | 6   | 33286335  | P          | 0.28    | 7.1e-06 | 6.1e-02 | 7.0e-03 | 7.5e-02 |
|              |     |           | Q          | 1       | 4.8e-02 | 1       | 1       | 1       |
|              |     |           | OR         | 0.96    | 0.84    | 0.93    | 0.90    | 0.93    |
| IP6K3        | 6   | 33689444  | P          | 6.2e-02 | 5.5e-04 | 0.10    | 4.0e-06 | 4.8e-02 |
|              |     |           | Q          | 1       | 1       | 1       | 3.9e-02 | 1       |
|              |     |           | OR         | 1.07    | 1.13    | 0.94    | 0.83    | 1.07    |
| RNASET2      | 6   | 167342992 | P          | 1.4e-06 | 2.0e-07 | 8.5e-07 | 0.13    | 6.1e-06 |
|              |     |           | Q          | 1.5e-02 | 2.5e-03 | 8.9e-03 | 1       | 4.4e-02 |
|              |     |           | OR         | 0.83    | 0.82    | 0.83    | 0.94    | 0.84    |
| AL133458.1   | 6   | 167357853 | P          | 1.3e-05 | 3.5e-06 | 6.6e-06 | 1.7e-02 | 2.2e-05 |
|              |     |           | Q          | 0.10    | 2.8e-02 | 5.6e-02 | 1       | 0.14    |
|              |     |           | OR         | 0.85    | 0.84    | 0.84    | 0.91    | 0.85    |
| FGFR1OP      | 6   | 167412670 | P          | 4.6e-06 | 0.90    | 3.4e-02 | 0.41    | 3.0e-05 |
|              |     |           | Q          | 4.7e-02 | 1       | 1       | 1       | 0.17    |
|              |     |           | OR         | 1.18    | 1.00    | 1.08    | 1.03    | 1.16    |
| C6orf123     | 6   | 168185217 | P          | N/A     | 6.8e-06 | 0.47    | 0.29    | 8.8e-03 |
|              |     |           | Q          | N/A     | 4.7e-02 | 1       | 1       | 1       |
|              |     |           | OR         | N/A     | 1.18    | 1.02    | 0.96    | 0.90    |
| AC004967.7   | 7   | 97598317  | P          | 4.5e-02 | 9.6e-07 | 0.30    | 0.94    | 0.95    |
|              |     |           | Q          | 1       | 9.8e-03 | 1       | 1       | 1       |
|              |     |           | OR         | 1.07    | 1.20    | 1.03    | 1.00    | 1.00    |
| GPIHBP1      | 8   | 144295068 | P          | 0.31    | 0.38    | 4.3e-06 | 0.27    | 0.38    |
|              |     |           | Q          | 1       | 1       | 3.8e-02 | 1       | 1       |
|              |     |           | OR         | 1.03    | 1.03    | 1.18    | 1.04    | 1.03    |
| RP11-318E3.4 | 10  | 5903768   | P          | 0.62    | 0.46    | 1.2e-06 | 0.92    | 0.99    |
|              |     |           | Q          | 1       | 1       | 1.1e-02 | 1       | 1       |
|              |     |           | OR         | 0.98    | 0.97    | 1.19    | 0.99    | 1.00    |
| TMEM109      | 11  | 60681346  | P          | 0.92    | 1.1e-06 | 0.26    | 3.0e-02 | 0.18    |
|              |     |           | Q          | 1       | 1.0e-02 | 1       | 1       | 1       |
|              |     |           | OR         | 1.00    | 0.83    | 0.95    | 0.92    | 0.95    |
| SYT7         | 11  | 61282785  | P          | 3.8e-02 | 0.94    | 1.6e-09 | 0.32    | 0.76    |
|              |     |           | Q          | 1       | 1       | 4.7e-05 | 1       | 1       |
|              |     |           | OR         | 1.08    | 1.00    | 0.79    | 1.03    | 1.01    |

continued on next page

**Table S2 – continued from previous page**

| Gene           | Chr | Position | Statistics | Blood   | Nerve   | Lung    | Muscle  | Skin    |
|----------------|-----|----------|------------|---------|---------|---------|---------|---------|
| TMEM258        | 11  | 61535973 | P          | 8.3e-07 | 2.8e-09 | 1.1e-06 | 5.7e-08 | 2.3e-08 |
|                |     |          | Q          | 9.4e-03 | 6.1e-05 | 1.1e-02 | 1.0e-03 | 4.5e-04 |
|                |     |          | OR         | 0.82    | 0.79    | 0.83    | 0.81    | 0.80    |
| FEN1           | 11  | 61560109 | P          | 0.66    | 5.0e-05 | 8.2e-08 | 3.0e-03 | 7.8e-02 |
|                |     |          | Q          | 1       | 0.24    | 1.2e-03 | 1       | 1       |
|                |     |          | OR         | 0.98    | 1.16    | 1.22    | 1.11    | 1.06    |
| FADS2          | 11  | 61560452 | P          | 9.8e-09 | 2.7e-08 | 3.4e-09 | 8.5e-10 | 7.6e-08 |
|                |     |          | Q          | 2.4e-04 | 4.7e-04 | 8.2e-05 | 3.0e-05 | 1.1e-03 |
|                |     |          | OR         | 0.79    | 0.80    | 0.79    | 0.79    | 0.81    |
| FADS1          | 11  | 61567099 | P          | 2.6e-08 | 1.4e-09 | 0.17    | 2.7e-09 | 0.10    |
|                |     |          | Q          | 4.9e-04 | 3.4e-05 | 1       | 7.4e-05 | 1       |
|                |     |          | OR         | 0.81    | 1.25    | 1.05    | 1.25    | 1.06    |
| TMEM223        | 11  | 62539101 | P          | 7.5e-02 | 0.56    | 5.5e-02 | 2.1e-03 | 6.5e-07 |
|                |     |          | Q          | 1       | 1       | 1       | 1       | 7.1e-03 |
|                |     |          | OR         | 0.93    | 1.02    | 0.93    | 0.89    | 0.83    |
| GRM5-AS1       | 11  | 88237744 | P          | N/A     | 3.0e-06 | 7.6e-04 | N/A     | N/A     |
|                |     |          | Q          | N/A     | 2.5e-02 | 1       | N/A     | N/A     |
|                |     |          | OR         | N/A     | 0.84    | 1.13    | N/A     | N/A     |
| RAB5B          | 12  | 56367697 | P          | 0.59    | 0.97    | 0.19    | 6.5e-07 | 0.61    |
|                |     |          | Q          | 1       | 1       | 1       | 8.2e-03 | 1       |
|                |     |          | OR         | 0.98    | 0.99    | 1.04    | 0.83    | 1.01    |
| AC034102.1     | 12  | 56385991 | P          | 1.9e-03 | 0.12    | 0.36    | 5.0e-07 | 0.69    |
|                |     |          | Q          | 1       | 1       | 1       | 6.5e-03 | 1       |
|                |     |          | OR         | 1.12    | 1.06    | 1.03    | 0.83    | 1.01    |
| SUOX           | 12  | 56390964 | P          | 6.2e-05 | 2.8e-06 | 8.2e-04 | 3.8e-03 | 1.2e-06 |
|                |     |          | Q          | 0.34    | 2.4e-02 | 1       | 1       | 1.1e-02 |
|                |     |          | OR         | 0.86    | 0.84    | 0.88    | 0.89    | 0.83    |
| RPS26          | 12  | 56435637 | P          | 5.1e-06 | 3.2e-03 | 3.0e-07 | 0.36    | 2.1e-07 |
|                |     |          | Q          | 5.1e-02 | 1       | 3.4e-03 | 1       | 2.9e-03 |
|                |     |          | OR         | 1.18    | 1.11    | 1.20    | 1.03    | 1.21    |
| ESYT1          | 12  | 56512034 | P          | 0.30    | 6.2e-06 | 0.75    | 0.47    | 3.1e-04 |
|                |     |          | Q          | 1       | 4.4e-02 | 1       | 1       | 1       |
|                |     |          | OR         | 1.03    | 1.18    | 0.98    | 0.97    | 1.14    |
| RP11-977G19.12 | 12  | 56702652 | P          | 4.2e-02 | 0.72    | 7.1e-02 | 1.6e-06 | 0.39    |
|                |     |          | Q          | 1       | 1       | 1       | 1.9e-02 | 1       |
|                |     |          | OR         | 1.07    | 1.01    | 1.06    | 1.19    | 0.96    |
| PAN2           | 12  | 56710007 | P          | 2.1e-03 | 2.9e-02 | 3.7e-06 | 0.16    | 1.0e-02 |
|                |     |          | Q          | 1       | 1       | 3.3e-02 | 1       | 1       |
|                |     |          | OR         | 1.12    | 0.92    | 1.18    | 1.05    | 0.90    |
| SPRYD4         | 12  | 56862301 | P          | 0.83    | 0.21    | 0.42    | 0.11    | 1.0e-06 |
|                |     |          | Q          | 1       | 1       | 1       | 1       | 1.0e-02 |
|                |     |          | OR         | 1.00    | 0.95    | 1.03    | 1.05    | 1.19    |

continued on next page

**Table S2 – continued from previous page**

| Gene          | Chr | Position | Statistics | Blood   | Nerve | Lung    | Muscle  | Skin |
|---------------|-----|----------|------------|---------|-------|---------|---------|------|
| AC005702.1    | 17  | 58119722 | P          | N/A     | 0.15  | 7.3e-08 | N/A     | 0.26 |
|               |     |          | Q          | N/A     | 1     | 1.1e-03 | N/A     | 1    |
|               |     |          | OR         | N/A     | 0.94  | 1.22    | N/A     | 0.95 |
| FAM106DP      | 17  | 58250683 | P          | 5.9e-07 | N/A   | N/A     | N/A     | N/A  |
|               |     |          | Q          | 6.9e-03 | N/A   | N/A     | N/A     | N/A  |
|               |     |          | OR         | 1.20    | N/A   | N/A     | N/A     | N/A  |
| LLNLR-246C6.1 | 19  | 15456879 | P          | 0.18    | 0.71  | 0.65    | 4.4e-06 | 0.69 |
|               |     |          | Q          | 1       | 1     | 1       | 4.1e-02 | 1    |
|               |     |          | OR         | 1.05    | 0.98  | 0.98    | 1.18    | 1.01 |
| IL2RB         | 22  | 37521878 | P          | 0.26    | 0.98  | 0.22    | 2.7e-06 | 0.69 |
|               |     |          | Q          | 1       | 1     | 1       | 3.1e-02 | 1    |
|               |     |          | OR         | 1.04    | 0.99  | 1.04    | 1.19    | 0.98 |
